# Supplementary material
Source: Springer Nature journal article supplement (https://www.springermedizin.de/resource/supplementary/12943_2013_1302_MOESM3_ESM.pdf/9553210)

A

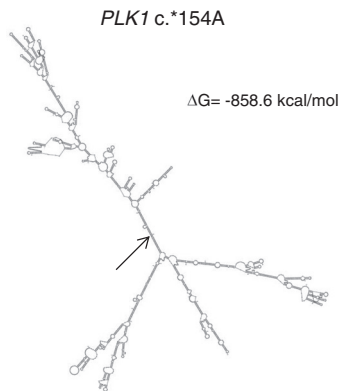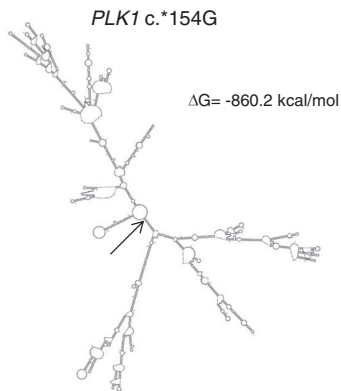

B

*PLK1* c.\*154A>G

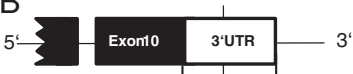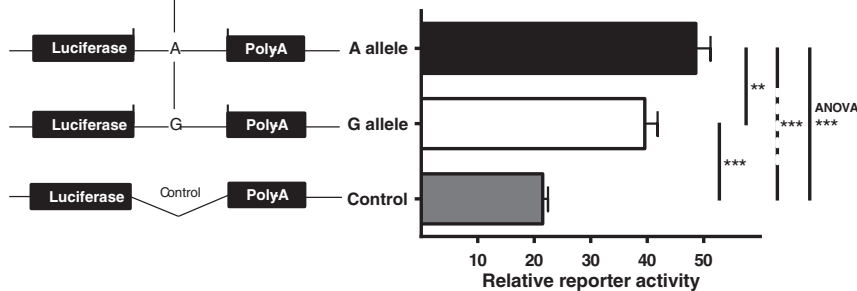

Supplement: MOESM3 [file 9553210]
